# Supplementary material for: Genetic regulation of Wnt/PCP components through Fgf10/Fgfr2/Sox9 module in tear duct development
Source: Research Square preprint supplement (doi:10.21203/rs.3.rs-7980825/v1), 2025-11-25
Supplement: Supplementary file 1 [file 6b144c15def1dac0bacacbb8.pdf]

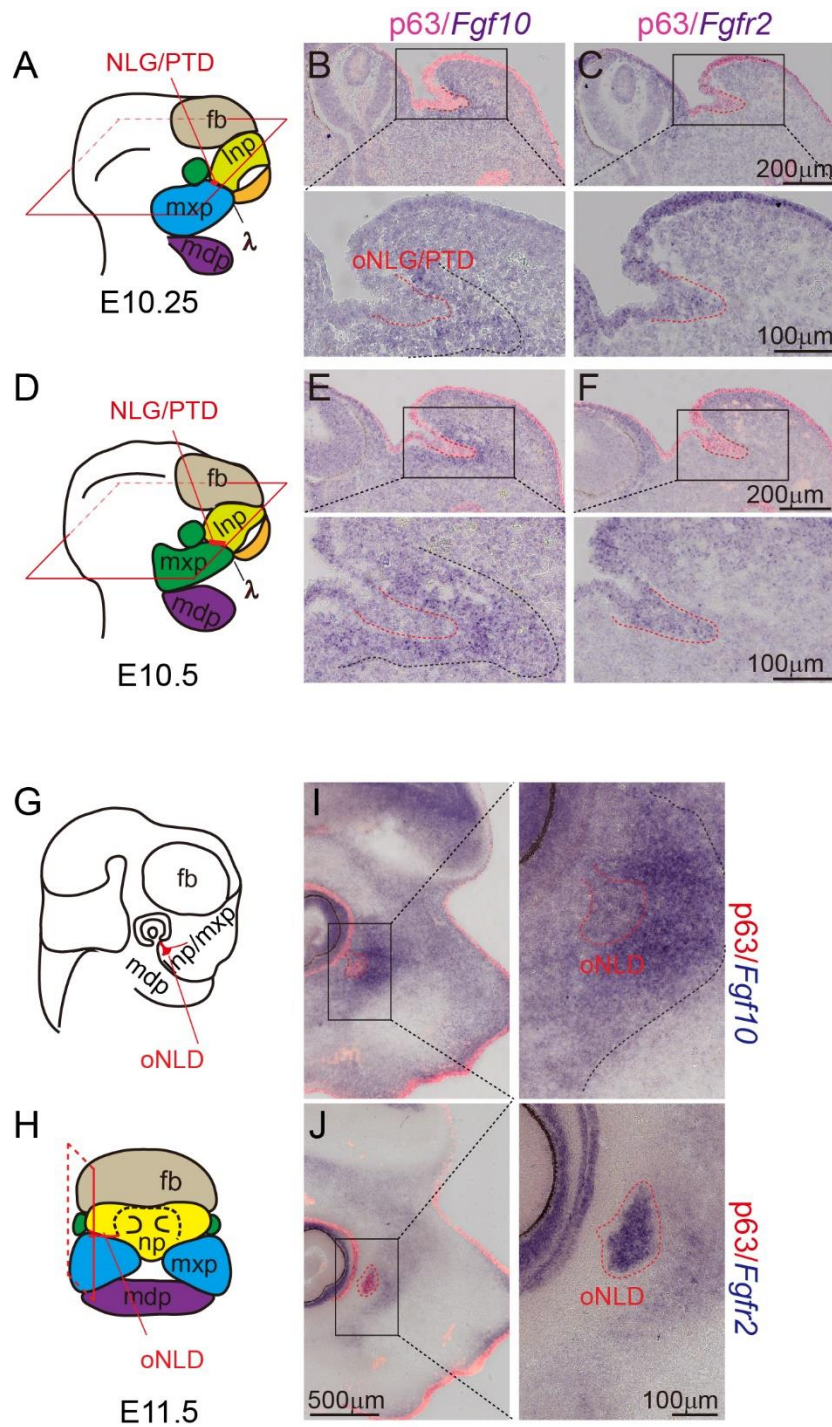

**Supplementary Figure1. Expression of *Fgf10* and *Fgfr2* in developing oNLG/PTD.**

(A) Diagram of a lateral view of an embryonic head at E10.25, showing the location of NLG/PTD. “NLG/PTD”, nasolacrimal groove/primordial tear duct; “lnp”, lateral nasal

process; “mxp”, maxillary process; “mdp”, mandibular process; “λ”, lambada junction; “fb”, forebrain. The parallelogram indicates the cutting planes shown in **(B, C)**. **(B, C)** Serial sections of E10.25 embryos (same set as in Fig. 1D, E), showing *Fgf10* **(B)** and *Fgfr2* **(C)** *in situ* hybridization signals, co-stained with p63 immunostaining (pink). Boxed areas in **(B)** and **(C)** are magnified below each main panel. “oNLG”, orbital NLG. **(D)** Diagram of an embryonic head at E10.5, with the parallelogram indicating the cutting planes shown in **(E, F)**. Abbreviations as in **(A)**. **(E, F)** *Fgf10* and *Fgfr2 in situ* hybridizations co-stained with p63, arranged as in **(B)** and **(C)**. **(G, H)** Diagrams of lateral **(G)** and frontal **(H)** views of an embryonic head at E11.5. “oNLD”, orbital nasolacrimal duct (NLD). “np”, nasal plate. The parallelogram indicates the cutting planes shown in **(I, J)** Other abbreviations as in **(A)**. **(I)**, *Fgf10 in situ* hybridization, co-stained with p63. **(J)**, *Fgfr2 in situ* hybridization, co-stained with p63.

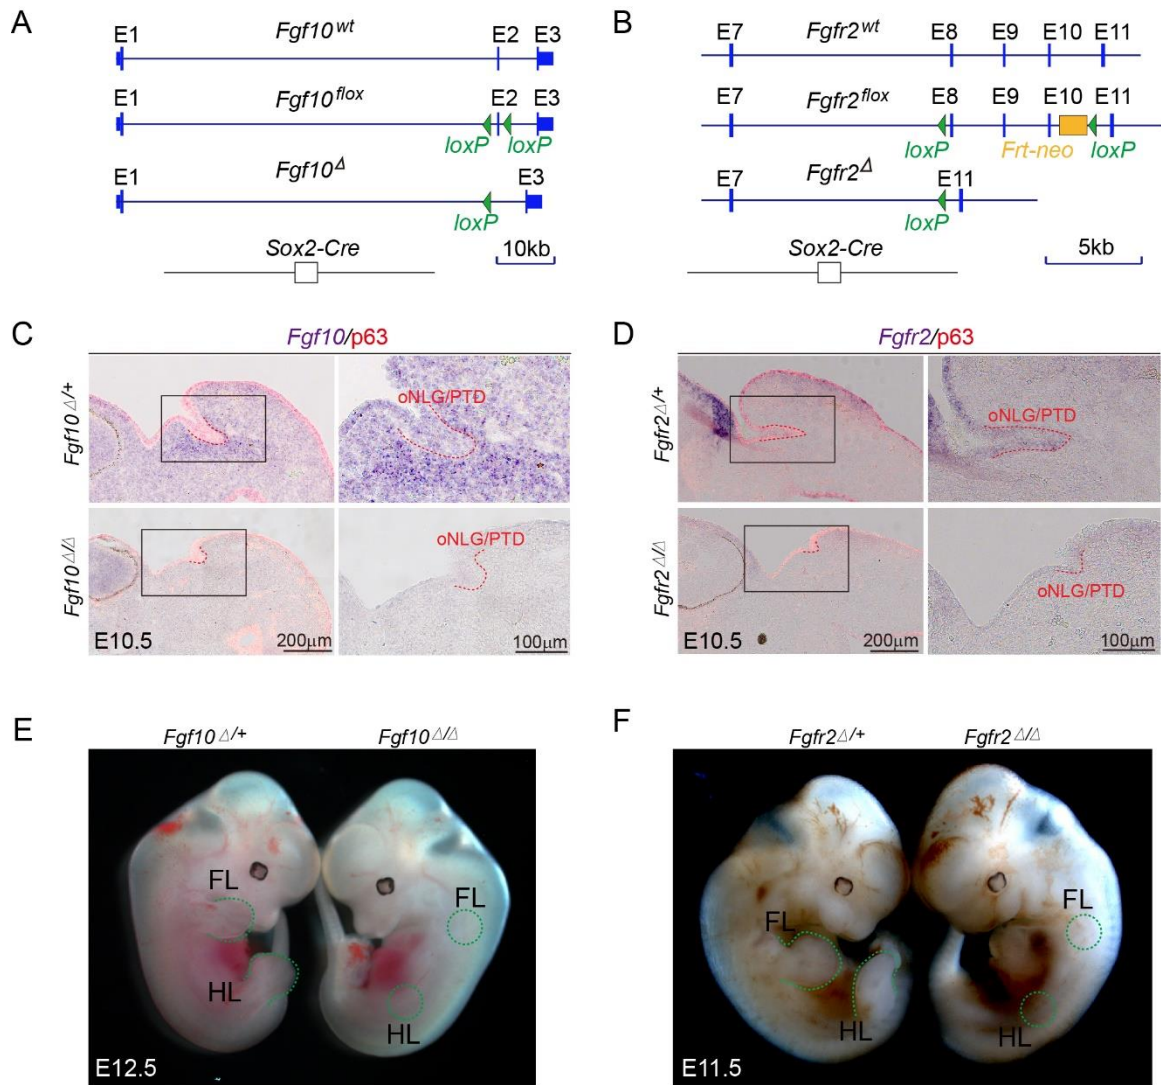

**Supplementary Figure 2. Generation of *Fgf10* and *Fgfr2* germline knockout mice.**

(A) Schematic of *Fgf10* alleles: *Fgf10*<sup>wt</sup>, wild type; *Fgf10*<sup>fllox/+</sup>, floxed; and *Fgf10*<sup>Δ/+</sup>, recombined. *Sox2-Cre* transgene was crossed onto *Fgf10*<sup>fllox/+</sup> to generate *Fgf10*<sup>Δ/+</sup> mice, which were subsequently intercrossed to homozygosity (*Fgf10*<sup>Δ/Δ</sup>). Green triangles indicate *loxP* sites; blue boxes, exons (E). (B) Schematic of *Fgfr2* alleles: *Fgfr2*<sup>wt</sup>, wild type; *Fgfr2*<sup>fllox/+</sup>, floxed; and *Fgfr2*<sup>Δ/+</sup>, recombined. The same breeding strategy as in (A) was used to generate *Fgfr2*<sup>Δ/Δ</sup> mutants. The *Frt*-flanked neo cassette is shown in yellow. (C) Serial sections of E10.5 embryos (same set as in Fig. 1F), showing *Fgf10* *in situ* hybridization co-stained with p63 immunostaining (pink). Control, *Fgf10*<sup>Δ/+</sup>; mutant, *Fgf10*<sup>Δ/Δ</sup>.

*Fgf10*<sup>Δ/Δ</sup>. Boxed areas are magnified to the right. oNLG/PTD, orbital nasolacrimal groove/primordial tear duct (NLG/PTD). **(D)** *Fgfr2* in situ hybridization co-stained with p63 on E10.5 head sections. Control, *Fgfr2*<sup>Δ/+</sup>; mutant, *Fgfr2*<sup>Δ/Δ</sup>. Boxed areas were magnified to the right. See also Fig. 1G. **(E)** Whole-mount images of E12.5 *Fgf10* control and mutant embryos. Note the absence of forelimbs (FL) and hindlimbs (HL) in the *Fgf10*<sup>Δ/Δ</sup> embryos (green dashed lines). **(F)** E11.5 *Fgfr2* control (*Fgfr2*<sup>Δ/+</sup>) and mutant (*Fgfr2*<sup>Δ/Δ</sup>) embryos. Mutants exhibit limb truncations similar to, but less severe than, those in *Fgf10* mutants.

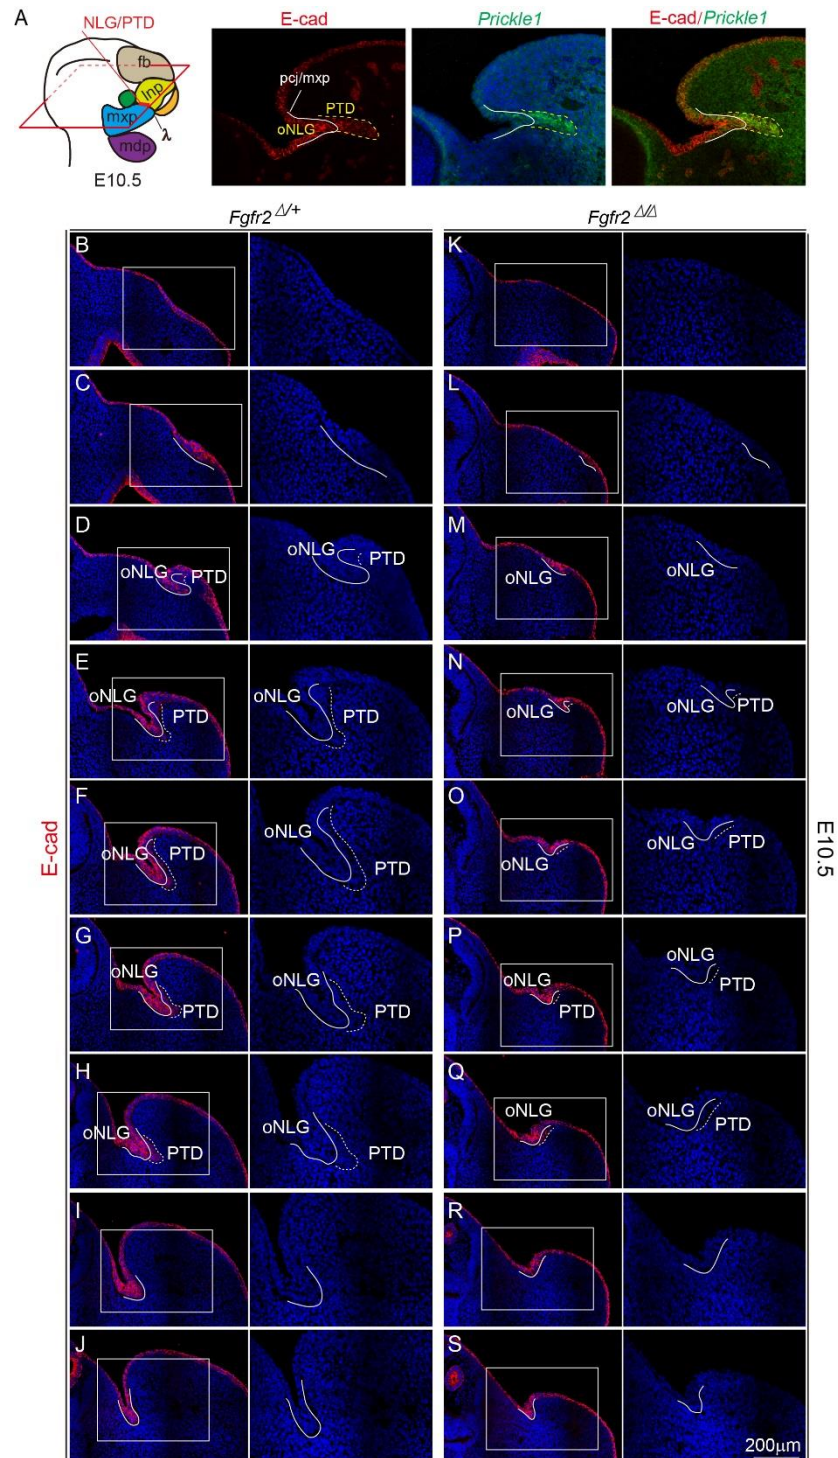

**Supplementary Figure 3. E-cadherin-stained sections from *Fgfr2* control and mutant (*Fgfr2*<sup>Δ/Δ</sup>) embryos for the quantification of oNLG and PTD cells.**

(A) Diagram of facial structures in an E10.5 embryo. Abbreviations are as defined in previous figures. Horizontal tissue sections containing oNLG/PTD were stained for E-cadherin (red) and GFP (green), a knock-in reporter in the *Prickle1* locus (modified from Guo et al., 2020<sup>23</sup>). Cells with low E-cadherin and high Prickle1 were identified as PTD precursors derived from oNLG. Solid lines delineate oNLG; dashed lines delineate PTD.

(B-J) *Fgfr2*<sup>Δ/+</sup> controls. (K-S) *Fgfr2*<sup>Δ/Δ</sup> mutants. In controls, oNLG/PTD was located at the levels between (D) and (H), whereas in mutants it was located between (N) and (Q) in the mutants.

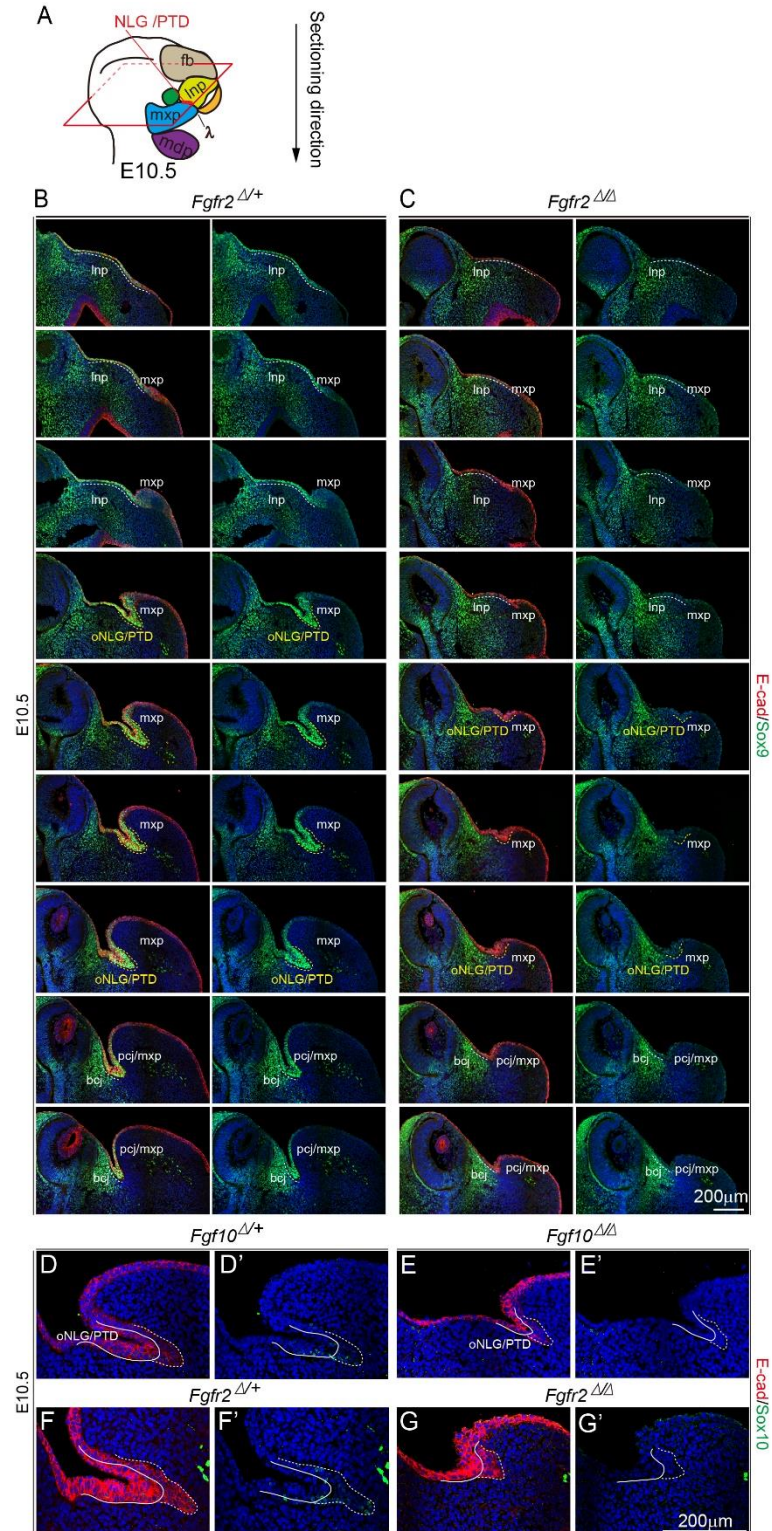

**Supplementary Figure 4. Loss of Sox9 and Sox10 expression upon germline deletion of *Fgf10* and *Fgfr2*.** (A) Schematic of an E10.5 embryonic head. Serial

sections were collected along the axis indicated by the black arrow. “NLG/PTD”, Nasolacrimal groove/primordial tear duct; “lnp”, lateral nasal process; “mxp”, maxillary process; “mdp”, mandibular process; “λ”, lambda junction; “fb”, forebrain. **(B)** E-cadherin (red) and Sox9 (green) staining of serial sections across oNLG/PTD regions of a *Fgfr2*<sup>Δ/+</sup> control embryo at E10.5. **(C)** E10.5 embryonic sections from *Fgfr2*<sup>Δ/Δ</sup> mutants stained the same as **(B)**. **(D-G, D'-G')** E-cadherin and Sox10 stained E10.5 oNLG/PTD sections. **(D, D')** *Fgf10*<sup>Δ/+</sup> control embryos. **(E, E')**, *Fgf10*<sup>Δ/Δ</sup> mutant embryos. **(F, F')** *Fgfr2*<sup>Δ/+</sup> control embryos. **(G, G')**, *Fgfr2*<sup>Δ/Δ</sup> mutant embryos.



Sox9 conditional mutants and workflow of tamoxifen injections. **(B-G)** The same set of in situ sections as in Fig. 5G-L showing additional p63 staining channel (pink). **(H, I)** Efficiency of Sox9 conditional deletion. Sox9 control (*Sox9<sup>flox/+</sup>;CreERT2*) NLD showed intensely stained Sox9 protein **(H)**, while mutant (*Sox9<sup>flox/flox</sup>;CreERT2*) NLD markedly reduced Sox9 expression **(I)**. **(J, K)** Efficiency of *Fgfr2* conditional deletion. *Fgfr2* control (*Fgfr2<sup>flox/+</sup>;CreERT2*) NLD showed intense *Fgfr2 in situ* signal **(J)**, whereas the mutant NLD nearly lost *Fgfr2* expression. **(L, M)** The same sections from (J, K) with p63 staining channel (pink). **(N)** Quantification of NLD length in Sox9 and *Fgfr2* control and mutant embryos at E12. Only sections in which the entire NLD was captured within a single section were selected to ensure accurate measurement of its length. Each data point represents one section, with multiple sections ( $n > 5$ ) from at least three embryos evaluated.

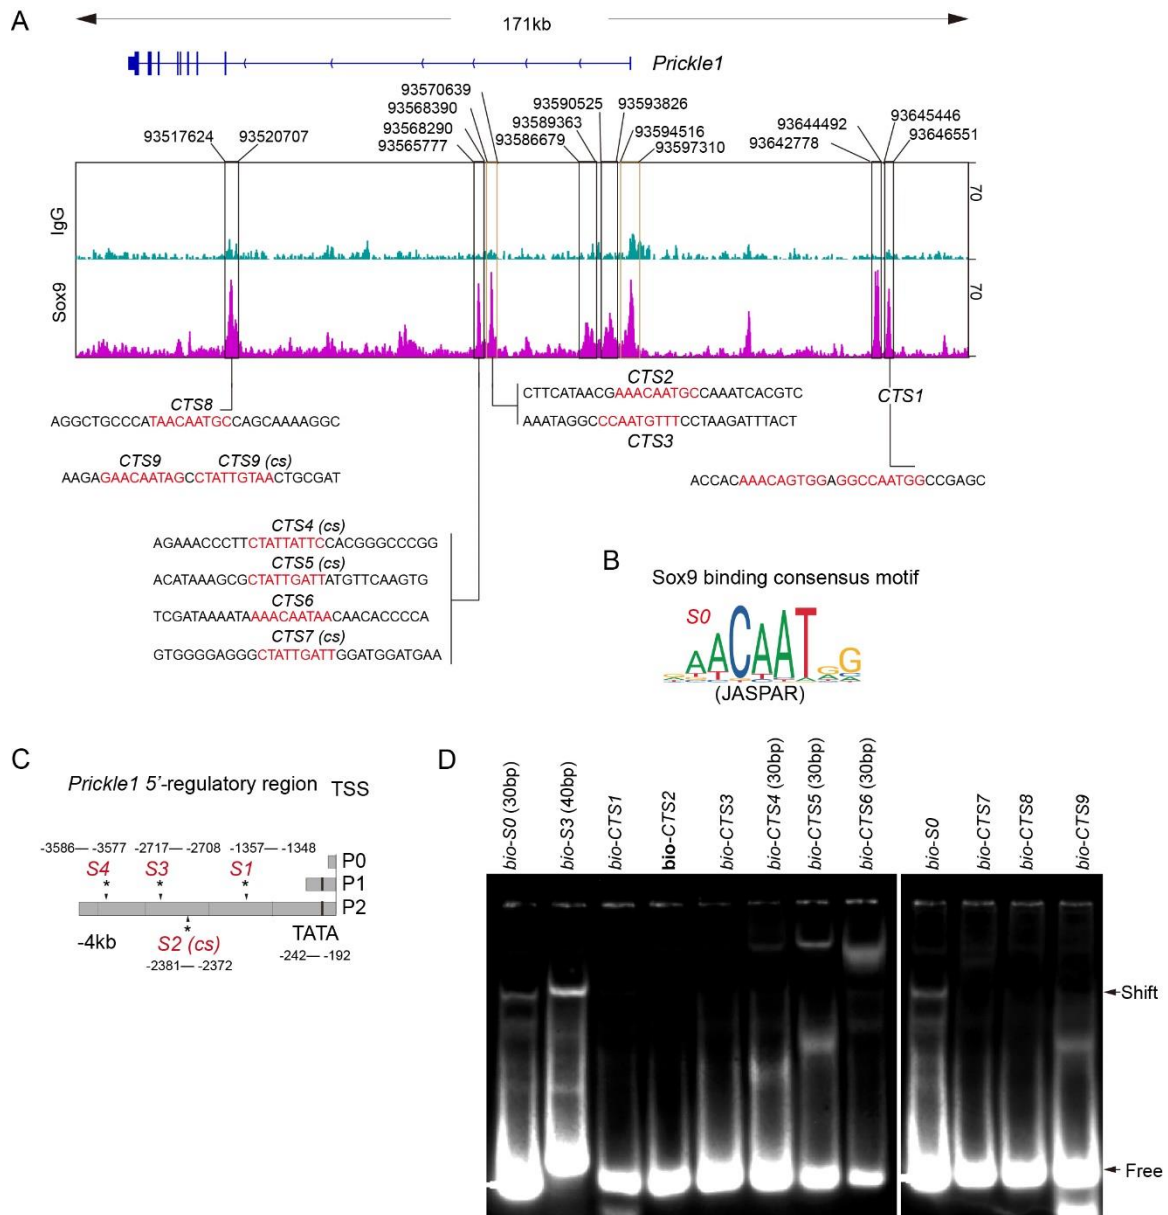

Supplementary Figure 6

**Supplementary Figure 6. Sox9-binding peaks identified in *Prickle1* locus by Cut & Tag analysis and electrophoretic mobility shift assay (EMSA).** (A), Histograms of Sox9 binding peaks in *Prickle1* locus with genomic locations labeled above the grams. CTS1-9 are predicted Sox9 binding sites from Cut & Tag. (B), Sox9-binding consensus motif (S0). (C) Predicted binding variants (S1-4) from the consensus motif in a 4-kb

upstream *Prickle1* promoter region (also refer to Fig. 7A, B). **(D)** EMSA identified biotin-labeled (*bio-S3*) showing positive shift. *bio-S0* serves as a positive control.
