# Supplementary material for: Genetic regulation of Wnt/PCP components through Fgf10/Fgfr2/Sox9 module in tear duct development
Source: Research Square preprint supplement (doi:10.21203/rs.3.rs-7980825/v1), 2025-11-25
Supplement: Supplementary file 1 [file cb7df1009f978524342e8d78.docx]

| **Supplemental Table 1**：Primers used for genotyping | | |
| --- | --- | --- |
| Name | Sequence | Use |
| *Fgf10-flox-F* | 5'-CTCTTTTAGTAAGGTCCTCATGTGCCT-3' | genotype *Fgf10+/+*, and *Fgf10* *flox/flox* |
| *Fgf10-flox-R* | 5'-ATAACCAGTATCTGGCACACAGTAGC-3' |
| *Fgf10-delta-F* | 5'-GTTGCATACACCAAACTCTGCCT-3' | genotype *Fgf10*Δ/+ |
| *Fgf10-delta-R* | 5'-ATAACCAGTATCTGGCACACAGTAGC-3' |
| *Fgfr2-flox-F* | 5'-ATAGGAGCAACAGGCGG-3' | genotype *Fgfr2+/+*, and *Fgfr2* *flox/flox* |
| *Fgfr2-flox-R* | 5'-TGCAAGAGGCGACCAGTCAG-3' |
| *Fgfr2-delta-F* | 5'-ATAGGAGCAACAGGCGG-3' | genotype *Fgfr2* Δ/+ |
| *Fgfr2-delta-R* | 5'-CATAGCACAGGCCAGGTTG-3' |
| Sox2-Cre-F | 5'-CCTTTGTCCCAAATCTGTGC-3' | genotype *Sox2-Cre* |
| *Sox2-Cre-R* | 5'-GCCCAAATGTTGCTGGATAG-3' |
| *Rosa26-CreER-WT-F* | 5'-CTGGCTTCTGAGGACCG-3' | genotype *CreER* WT allele |
| *Rosa26-CreER-WT-R* | 5'-CCGAAAATCTGTGGGAAGTC-3' |
| *Rosa26-CreER-F* | 5'-CGTGATCTGCAACTCCAGTC-3' | Genotype *Rosa26-CreER* allele |
| *Rosa26-CreER-R* | 5'-AGGCAAATTTTGGTGTACGG-3' |
| *Sox9*-flox-F | 5'-AGACTCTGGGCAAGCTCTGG-3' | genotype *Sox9+/+*, and *Sox9 flox/flox* |
| *Sox9*-flox-R | 5'-GTCATATTCACGCCCCCATT-3' |
| *Sox9*-delta-F | 5'-GTCAAGCGACCCATGAACGC-3' | genotype *Sox9Δ/+* |
| *Sox9*-delta-R | 5'-TGGTAATGAGTCATACACAGTAC-3' |
| *Prickle1*-WT-F | 5'-GCACAGCCGGAATCATCATCTGATGTGG-3' | genotype *Prickle1* WT allele |
| *Prickle1*-WT-R | 5'-ATAACACACCGTGCTACCAAAGCCAACATC-3' |
| *Prickle1*-b-F | 5'-ATCACTCTCGGCATGGACGAGCTGTACAAG-3' | genotype *Prickle1+/-* allele |
| *Prickle1*-b-R | 5'-GTTGTCAAAGGCCATGTTTATCAGCAAC-3' |

| **Supplemental Table 2:** Primer sets for ISH probes | | |
| --- | --- | --- |
| Gene Name | Primers | |
| *Fgf10* | sense | T7: 5' -TAATACGACTCACTATAGGGGGGCTGCTGTTGCTGCTTC-3' |
| antisense | T3: 5' -AATTAACCCTCACTAAAGGGTTTGCCTGCCATTGTGCTG-3' |
| *Fgfr2* | sense | T7: 5' -TAATACGACTCACTATAGGGTGGTGGAGAATGAATACGG-3' |
| antisense | T3: 5' -AATTAACCCTCACTAAAGGGTGCAGGCGATTAAGAAGAC-3' |
| *Prickle1* | sense | T7: 5' -TAATACGACTCACTATAGGGACGAATAAGCCCGAGGTA-3' |
| antisense | T3: 5'- AATTAACCCTCACTAAAGGGGAAGAGTTCAGAGTTCCCATA-3' |
| *Celsr1* | sense | T7: 5' -TAATACGACTCACTATAGGGGCCTGTCGGAACGGTTAT-3' |
| antisense | T3: 5'- AATTAACCCTCACTAAAGGGCCCTTCATCCCTGGTGGT-3' |
| *Celsr2* | sense | T7: 5' -TAATACGACTCACTATAGGGACCAGCCTTACGGAGATTC-3' |
| antisense | T3: 5'- AATTAACCCTCACTAAAGGGCTTGAGGATGCCTTTGTGA-3' |
| *Fzd6* | sense | T7: 5' -TAATACGACTCACTATAGGGTCTCGGTTGCTATGTCTATG-3 |
| antisense | T3: 5'- AATTAACCCTCACTAAAGGGGTCTGCTCGTCCCTCTTT-3' |

| **Supplemental Table 3:** Primer sets for EMSA probes testing Sox9 binding | | |
| --- | --- | --- |
| Predicted Sox9 oligos | Primers | |
| S0 (canonical) | F | 5'-GGGTTAACAGAACAATGGAATCTGGTAGA-3' |
| R | 5'-TCTACCAGATTCCATTGTTCTGTTAACCC-3' |
| *mt-S0* | F | 5'-GGGTTAACAGCTAGCTAAATCTGGTAGA-3' |
| R | 5'-TCTACCAGATTTAGCTAGCTGTTAACCC-3' |
| *S1* | F | 5'-GCCAAGGCCAAGGAAATGCTGAGGAGCGAAAAGGCTTGGG-3' |
| R | 5'-CCCAAGCCTTTTCGCTCCTCAGCATTTCCTTGGCCTTGGC-3' |
| *S2* | F | 5'-TGGCGTGCGCCCGTACCCATAGTGACTCGGGAGGCTGAGAGAT-3' |
| R | 5'-ATCTCTCAGCCTCCCGAGTCACTATGGGTACGGGCGCACGCCA-3' |
| *S3* | F | 5'-CAGCCAGGTAGTTCACAATGGAGACTACATTTGTGCCATT-3' |
| R | 5'-AATGGCACAAATGTAGTCTCCATTGTGAACTACCTGGCTG-3' |
| *S4* | F | 5'-CTATGTCAGGCCGAGTCTGCACAATAGAGATCTGGGGTCAAGAG-3' |
| R | 5'-CTCTTGACCCCAGATCTCTATTGTGCAGACTCGGCCTGACATAG-3' |
| *mt-S1* | F | 5'-GCCAAGGCCAAGGAACCGATTGAGAGCGAAAAGGCTTGGG-3' |
| R | 5'-CCCAAGCCTTTTCGCTCTCAATCGGTTCCTTGGCCTTGGC-3' |
| *mt-S2* | F | 5'-TGGCGTGCGCCCGTACGCGATCCATCTCGGGAGGCTGAGAGAT-3' |
| R | 5'-ATCTCTCAGCCTCCCGAGATGGATCGCGTACGGGCGCACGCCA-3' |
| *mt-S3* | F | 5'-CAGCCAGGTAGTCTATGCTCGAGACTACATTTGTGCCATT-3' |
| R | 5'-AATGGCACAAATGTAGTCTCGAGCATAGACTACCTGGCTG-3' |
| *mt-S4* | F | 5'-CTATGTCAGGCCGAGTCTCGACTCGGTAGATCTGGGGTCAAGAG-3' |
| R | 5'-CTCTTGACCCCAGATCTACCGAGTCGAGACTCGGCCTGACATAG-3' |
| *CTS1* | F | 5‘-ACCACAAACAGTGGAGGCCAATGGCCGAGC-3’ |
| R | 5‘-GCTCGGCCATTGGCCTCCACTGTTTGTGGT-3’ |
| *CTS2* | F | 5‘-CTTCATAACGAAACAATGCCAAATCACGTC-3’ |
| R | 5‘-GACGTGATTTGGCATTGTTTCGTTATGAAG-3’ |
| *CTS3* | F | 5‘-AAATAGGCCCAATGTTTCCTAAGATTTACT-3’ |
| R | 5‘-AGTAAATCTTAGGAAACATTGGGCCTATTT-3’ |
| *CTS4* | F | 5‘-AGAAACCCTTCTATTATTCCACGGGCCCGG-3’ |
| R | 5‘-CCGGGCCCGTGGAATAATAGAAGGGTTTCT-3’ |
| *CTS5* | F | 5‘-ACATAAAGCGCTATTGATTATGTTCAAGTG-3’ |
| R | 5‘-CACTTGAACATAATCAATAGCGCTTTATGT-3’ |
| *CTS6* | F | 5‘-TCGATAAAATAAAACAATAACAACACCCCA-3’ |
| R | 5‘-TGGGGTGTTGTTATTGTTTTATTTTATCGA-3’ |
| *CTS7* | F | 5‘-GTGGGGAGGGCTATTGATTGGATGGATGAA-3’ |
| R | 5‘-TTCATCCATCCAATCAATAGCCCTCCCCAC-3’ |
| *CTS8* | F | 5‘-AGGCTGCCCATAACAATGCCAGCAAAAGGC-3’ |
| R | 5‘-GCCTTTTGCTGGCATTGTTATGGGCAGCCT-3’ |
| *CTS9* | F | 5‘-AAGAGAACAATAGCCTATTGTAACTGCGAT-3’ |
| R | 5‘-ATCGCAGTTACAATAGGCTATTGTTCTCTT-3’ |

| **Supplemental Table 4:** Primer sets for qPCR in ChIP | | |
| --- | --- | --- |
| PCR predicted Sox9 binding sites | Primers | |
| *S1* | sense | 5'-TGTACGGACAAGATGAAGA-3' |
| antisense | 5'-GCACAGGCTGCTGCTAT-3' |
| *S2* | sense | 5'-TCAAAACGGTCTCCTAC-3' |
| antisense | 5'-TGAGCAAAACTTTCCTAT-3' |
| *S3* | sense | 5'-ATGTGGCAAGACAAAGA-3' |
| antisense | 5'-GACAATAAAGTTTAATGGC-3' |
| *S4* | sense | 5'-CACCGTGGACTGGTAAC-3' |
| antisense | 5'-AACCCTGACTTGACATCC-3' |
| *Gapadh* | sense | 5’-TACTAGCGGTTTTACGGGCG-3’ |
| antisense | 5’-TCGAACAGGAGGAGCAGAGAGCGA-3’ |
